# Supplementary material
Source: MDPI journal article supplement (https://www.mdpi.com/2036-7503/15/3/40)
Supplement: s1 [file s1]

Table S1. PRISMA 2020 Checklist

| Section and Topic       | Item # | Checklist item                                                                                                                                                                                                                                                                                                                                                                                                                                                                                                                                                   | Location where item is reported |
|-------------------------|--------|------------------------------------------------------------------------------------------------------------------------------------------------------------------------------------------------------------------------------------------------------------------------------------------------------------------------------------------------------------------------------------------------------------------------------------------------------------------------------------------------------------------------------------------------------------------|---------------------------------|
| <b>TITLE</b>            |        |                                                                                                                                                                                                                                                                                                                                                                                                                                                                                                                                                                  |                                 |
| Title                   | 1      | Prevalence and pattern of birth defects in Saudi Arabia: A systematic review of observational studies                                                                                                                                                                                                                                                                                                                                                                                                                                                            | P 1                             |
| <b>ABSTRACT</b>         |        |                                                                                                                                                                                                                                                                                                                                                                                                                                                                                                                                                                  |                                 |
| Abstract                | 2      | See the PRISMA 2020 for Abstracts checklist.                                                                                                                                                                                                                                                                                                                                                                                                                                                                                                                     | S2                              |
| <b>INTRODUCTION</b>     |        |                                                                                                                                                                                                                                                                                                                                                                                                                                                                                                                                                                  |                                 |
| Rationale               | 3      | In Saudi Arabia, birth defects remain the leading cause of death among children, with high rates of consanguineous marriage and genetic diseases. There is lacking of existing knowledge regarding the overall prevalence of birth defects.                                                                                                                                                                                                                                                                                                                      | P2                              |
| Objectives              | 4      | To assess the prevalence of birth defects in Saudi Arabia and determine the pattern according to the available data                                                                                                                                                                                                                                                                                                                                                                                                                                              | P3                              |
| <b>METHODS</b>          |        |                                                                                                                                                                                                                                                                                                                                                                                                                                                                                                                                                                  |                                 |
| Eligibility criteria    | 5      | This review included original observational research that includes cohort, case-control, cross-sectional studies, case reports, and case series In addition, systematic reviews, review articles, non-relevant articles, and studies that did not fulfill the eligibility criteria were excluded.                                                                                                                                                                                                                                                                | P3                              |
| Information sources     | 6      | Electronic literature searches were conducted, including Pub Med (National Library of Medicine), Science Direct, and the Saudi digital library, for studies published between January 1989and January 2022.                                                                                                                                                                                                                                                                                                                                                      | P3                              |
| Search strategy         | 7      | The Medical Subjects Heading ( <a href="#">MeSH Database</a> ) and keywords search for non-MeSH data was conducted. The keywords employed for the search were "Prevalence" OR "Epidemiology" AND "Birth defects" OR "Congenital Abnormalities" OR "Congenital Malformation" OR "Congenital Anomalies" AND "Pattern" OR "types" OR "sub-types" AND "Saudi Arabia" OR "KSA". A manual search for identified references of included studies, relevant reviews, and grey literature was performed to find further relevant studies not found in the database search. | P3                              |
| Selection process       | 8      | Two researchers (TT and MH) screened studies and assessed their eligibility for inclusion.                                                                                                                                                                                                                                                                                                                                                                                                                                                                       | P3                              |
| Data collection process | 9      | Data abstraction was mediated by three researchers (KA, EE, and OA). Subsequently, one researcher (EE) assessed the quality of each study.                                                                                                                                                                                                                                                                                                                                                                                                                       | P4                              |

| Section and Topic             | Item # | Checklist item                                                                                                                                                                                                                                                                                                                                                                                                                                                                                                                                                                                                                                                                                                                                                                                                                                                                                                                                                                                                                                                                                                                                                                                                                                                                                                                                                                                                                                                                                                                                                                                                                                                                                                                                                                                                                                                           | Location where item is reported |
|-------------------------------|--------|--------------------------------------------------------------------------------------------------------------------------------------------------------------------------------------------------------------------------------------------------------------------------------------------------------------------------------------------------------------------------------------------------------------------------------------------------------------------------------------------------------------------------------------------------------------------------------------------------------------------------------------------------------------------------------------------------------------------------------------------------------------------------------------------------------------------------------------------------------------------------------------------------------------------------------------------------------------------------------------------------------------------------------------------------------------------------------------------------------------------------------------------------------------------------------------------------------------------------------------------------------------------------------------------------------------------------------------------------------------------------------------------------------------------------------------------------------------------------------------------------------------------------------------------------------------------------------------------------------------------------------------------------------------------------------------------------------------------------------------------------------------------------------------------------------------------------------------------------------------------------|---------------------------------|
| Data items                    | 10     | <p>PICO has been used to define inclusion criteria as follows:</p> <p><b>Population/ Patients:</b> Patients (males and females of all ages) diagnosed with birth defects, including cardiac, craniofacial, musculoskeletal, nervous, genitourinary, gastroenterological, and chromosomal defects. Study eligibility criteria: Inclusion Criteria: Patients diagnosed with birth defects, studies that calculate the prevalence of birth defects, studies that calculate risk factors of birth defects, and studies reporting the characteristics of different patterns of birth defects. The exclusion criteria were studies involving non-humans, opinion papers, editorials, previous reviews, studies validating epidemiological methods, or non-accessible articles were excluded.</p> <p><b>Intervention/ Exposure:</b> This review summarizes data on the epidemiology of birth defects, specifically the prevalence.</p> <p><b>Control:</b> Not Applicable.</p> <p><b>Outcomes:</b> The primary outcomes of this systematic review were the prevalence and patterns of birth defects in Saudi Arabia. The number of newborns delivered with birth defects divided by the total number of babies born during the study period who were enrolled in the study multiplied by 1000, was calculated to estimate the prevalence. At the same time, the main group patterns of birth defects were broadly classified according to the International Classification of Diseases coding system into the nervous system, cardiovascular, genitourinary, craniofacial, musculoskeletal, gastrointestinal, and chromosomal defects. In addition, subgroups were considered as some studies reported specific patterns like cleft lip and palate or congenital heart disease alone. Other outcomes, like the risk factors and clinical outcomes also were also considered.</p> | P4                              |
| Study risk of bias assessment | 11     | <i>Joanna Briggs Institute</i> (JBI) provides freely available critical assessment tools for systematic reviews, designed to be study-specific, and presented as checklist questions. Critical assessment checklist for observational studies is used to evaluate for quality of the studies, reliability, validity, and relevance to practice. Two JBI checklists were used: one for cohort studies and the other for cross-sectional studies. one researcher (EE) assessed the quality of each study.                                                                                                                                                                                                                                                                                                                                                                                                                                                                                                                                                                                                                                                                                                                                                                                                                                                                                                                                                                                                                                                                                                                                                                                                                                                                                                                                                                  | P5                              |
| Effect measures               | 12     | Not applicable                                                                                                                                                                                                                                                                                                                                                                                                                                                                                                                                                                                                                                                                                                                                                                                                                                                                                                                                                                                                                                                                                                                                                                                                                                                                                                                                                                                                                                                                                                                                                                                                                                                                                                                                                                                                                                                           | -                               |
| Synthesis methods             | 13     | Not applicable                                                                                                                                                                                                                                                                                                                                                                                                                                                                                                                                                                                                                                                                                                                                                                                                                                                                                                                                                                                                                                                                                                                                                                                                                                                                                                                                                                                                                                                                                                                                                                                                                                                                                                                                                                                                                                                           | -                               |
| Reporting bias assessment     | 14     | Not applicable                                                                                                                                                                                                                                                                                                                                                                                                                                                                                                                                                                                                                                                                                                                                                                                                                                                                                                                                                                                                                                                                                                                                                                                                                                                                                                                                                                                                                                                                                                                                                                                                                                                                                                                                                                                                                                                           | -                               |
| Certainty assessment          | 15     | For certainty of evidence, (GRADE) working group graded the evidence used and rated it as high, moderate, low, and very low certainty (GRADE). Subgroup and stratified analyses were performed according to age,                                                                                                                                                                                                                                                                                                                                                                                                                                                                                                                                                                                                                                                                                                                                                                                                                                                                                                                                                                                                                                                                                                                                                                                                                                                                                                                                                                                                                                                                                                                                                                                                                                                         | P5                              |

| Section and Topic             | Item # | Checklist item                                                                                                                                                                                                                                                                                                                                                                                                                                                                                                                                                                                                                                                                                                                                                                                                                                                                                                                                                                                                                                                                                      | Location where item is reported |
|-------------------------------|--------|-----------------------------------------------------------------------------------------------------------------------------------------------------------------------------------------------------------------------------------------------------------------------------------------------------------------------------------------------------------------------------------------------------------------------------------------------------------------------------------------------------------------------------------------------------------------------------------------------------------------------------------------------------------------------------------------------------------------------------------------------------------------------------------------------------------------------------------------------------------------------------------------------------------------------------------------------------------------------------------------------------------------------------------------------------------------------------------------------------|---------------------------------|
|                               |        | sex, and birth defect patterns.                                                                                                                                                                                                                                                                                                                                                                                                                                                                                                                                                                                                                                                                                                                                                                                                                                                                                                                                                                                                                                                                     |                                 |
| <b>RESULTS</b>                |        |                                                                                                                                                                                                                                                                                                                                                                                                                                                                                                                                                                                                                                                                                                                                                                                                                                                                                                                                                                                                                                                                                                     |                                 |
| Study selection               | 16a    | The databases revealed 1277 records of birth defects prevalence and contributing variables in Saudi Arabia through a systematic search based on PRISMA guidelines from three databases; PubMed (n= 348), SDL (n= 492), and Science Direct (n= 437). All identified papers were managed manually, and (n= 1088) of articles were excluded for duplication (n= 146) or ineligibility by automated tools (n= 942). r The titles and abstracts were screened (n= 189), and accordingly, (n= 151) were excluded. (n= 38) full-text papers were extracted for a more comprehensive evaluation. Twenty-six papers were included in the systematic review, and (n= 12) were excluded as they are not fulfilling the inclusion criteria.                                                                                                                                                                                                                                                                                                                                                                     | P6                              |
|                               | 16b    | Seven studies out of the eligible studies were identified to determine the overall prevalence of birth defects [20, 23, 26, 33, 38, 39, 41]. Eighteen additional studies were added for the prevalence of the subtypes of birth defects [21, 24, 25, 27–32, 34–37, 40, 42–45], and one case report was added for the associated one birth defect [45].                                                                                                                                                                                                                                                                                                                                                                                                                                                                                                                                                                                                                                                                                                                                              | P6                              |
| Study characteristics         | 17     | Retrospective study designs were used for 14 (53.8%) of the studies, compared to seven (27%) prospective designs, and there was one case report. These studies were conducted between 1989 and 2020. Eleven studies (42.3%) were conducted in Riyadh [20,23,30,32–34,37–40,44], three (11.5%) in Jeddah [31,35,38], and three(11.5%) in Madinah [21,24,42]. The sample size, excluding the one case report, ranged from 42 in one study to 45,682 in a prospective, cross-sectional, community-based study, including the 13 administrative regions of Saudi Arabia [41,25].                                                                                                                                                                                                                                                                                                                                                                                                                                                                                                                        | P6                              |
| Risk of bias in studies       | 18     | Present assessments of risk of bias for each included study in figure 2 and 3.                                                                                                                                                                                                                                                                                                                                                                                                                                                                                                                                                                                                                                                                                                                                                                                                                                                                                                                                                                                                                      | Figure 2&3                      |
| Results of individual studies | 19     | <p><b>Prevalence of birth defects:</b><br/>the highest overall prevalence of birth defects was 46.5 per 1000 live births in a prospective study that included 30,632 babies; this rate was compared to a lower prevalence of 8.6 per 1000 in a retrospective study conducted in Al Ahsa that included 37,168 live births [30,43]. When considering the study period, four prevalence studies (two for Riyadh, one for Al-Ahsa, and one for Al-Khobar) could be included in the prevalence estimates [20,30,36,43]. These four studies reported birth defects from 1992 to 2013, with prevalence rates of 41.5, 46.5, 8.6, and 17 per 1000 live births, respectively. Although another comprehensive study of 13 administrative regions in Saudi Arabia estimated the prevalence of birth defects to be 16.9/1000 in all Saudi regions, it included an age range extending to 19 years old, making it incomparable to other studies [25].</p> <p><b>Pattern of birth defects:</b><br/>Seven studies assessed the overall birth defects: four in Riyadh, two in Al Ahsa, and one in Al-Khobar. As</p> | P6,7,8                          |

| Section and Topic     | Item # | Checklist item                                                                                                                                                                                                                                                                                                                                                                                                                                                                                                                                                                                                                                                                                                                                                                                                                                                                                                                                                                                                                                                                                                                                                                                                                                                                                                                                                                                                                                                                                                                                                                                                                                                                                                                                                                                                                                                                                                                                                                                                                                                                                                                                                                                                                                                                                  | Location where item is reported |
|-----------------------|--------|-------------------------------------------------------------------------------------------------------------------------------------------------------------------------------------------------------------------------------------------------------------------------------------------------------------------------------------------------------------------------------------------------------------------------------------------------------------------------------------------------------------------------------------------------------------------------------------------------------------------------------------------------------------------------------------------------------------------------------------------------------------------------------------------------------------------------------------------------------------------------------------------------------------------------------------------------------------------------------------------------------------------------------------------------------------------------------------------------------------------------------------------------------------------------------------------------------------------------------------------------------------------------------------------------------------------------------------------------------------------------------------------------------------------------------------------------------------------------------------------------------------------------------------------------------------------------------------------------------------------------------------------------------------------------------------------------------------------------------------------------------------------------------------------------------------------------------------------------------------------------------------------------------------------------------------------------------------------------------------------------------------------------------------------------------------------------------------------------------------------------------------------------------------------------------------------------------------------------------------------------------------------------------------------------|---------------------------------|
|                       |        | <p>shown in Figure 4, the most prevalent birth defects were cardiovascular, genitourinary, and craniofacial [20,23,30,36,42–44].</p> <p>Studies involving specific subgroups of birth defects have also been conducted. Five studies reported cleft lip and palate in particular [22,32–35] and non-syndromic cleft lip and palate (CLP) in affected children. Three studies involved cardiac birth defects and showed the predominance of acyanotic CHDs, namely ventricular septal defects (VSDs) and atrial septal defects (ASDs) [21,26,41]. Generally, congenital heart disease frequently shows a higher prevalence than other birth defects [20,23,30,43,44]. Genitourinary defects appeared to have a high prevalence in four studies [20,23,30,44], with one study conducted in Riyadh showing a prevalence of 19.8/1000 live births and an antenatal prevalence of 21.3/1000 [30]. Additionally, another study enrolled 81 children with ambiguous genitalia and concluded that congenital adrenal hyperplasia was the most common cause of this defect [40]. The incidence rate of digestive system defects was 1.3/1000, with imperforate anus and trachea–esophageal fistula/atresia constituting a higher percentage of birth defects [27]. Nervous system defects contributed to birth defects in nine studies [20,23,24,30,36,37,39,43,44]. Neural tube defects (NTDs) showed percentages ranging between 4.6% to 10.6% [20,23] and a prevalence of 6.1/1000 in one study [30], whereas hydrocephalus showed a prevalence of 1.6/1000 live births [24]. Chromosomal abnormalities included Down syndrome (6.6/10,000) as the most typical birth defect [25,29,36,44].</p> <p><b>Risk factors associated with birth defects:</b></p> <p>Twelve of the included studies [20,22–25,29–31,39,42–44] reported relationships between consanguinity and birth abnormalities, which are highly prevalent in the Saudi population. Other risk factors, such as maternal folic acid supplementation, family history of birth defects or genetic abnormalities, and maternal comorbidities, were reported in several studies [20,24,26,27,36,39,40,43,45]. Male sex was associated with birth defects in two studies [34,35]; however, female sex was a risk factor in one study [28].</p> |                                 |
| Results of syntheses  | 20     | risk of bias among contributing studies was concluded in figure 2&3.                                                                                                                                                                                                                                                                                                                                                                                                                                                                                                                                                                                                                                                                                                                                                                                                                                                                                                                                                                                                                                                                                                                                                                                                                                                                                                                                                                                                                                                                                                                                                                                                                                                                                                                                                                                                                                                                                                                                                                                                                                                                                                                                                                                                                            | Figure 2&3                      |
| Reporting biases      | 21     | Not applicable                                                                                                                                                                                                                                                                                                                                                                                                                                                                                                                                                                                                                                                                                                                                                                                                                                                                                                                                                                                                                                                                                                                                                                                                                                                                                                                                                                                                                                                                                                                                                                                                                                                                                                                                                                                                                                                                                                                                                                                                                                                                                                                                                                                                                                                                                  | -                               |
| Certainty of evidence | 22     | For certainty of evidence, (GRADE) working group graded the evidence used and rated it as high to moderate grade                                                                                                                                                                                                                                                                                                                                                                                                                                                                                                                                                                                                                                                                                                                                                                                                                                                                                                                                                                                                                                                                                                                                                                                                                                                                                                                                                                                                                                                                                                                                                                                                                                                                                                                                                                                                                                                                                                                                                                                                                                                                                                                                                                                |                                 |
| <b>DISCUSSION</b>     |        |                                                                                                                                                                                                                                                                                                                                                                                                                                                                                                                                                                                                                                                                                                                                                                                                                                                                                                                                                                                                                                                                                                                                                                                                                                                                                                                                                                                                                                                                                                                                                                                                                                                                                                                                                                                                                                                                                                                                                                                                                                                                                                                                                                                                                                                                                                 |                                 |
| Discussion            | 23a    | The prevalence of birth defects in Saudi Arabia ranged from 8.6/1000 to 46.45/1000. The most frequent birth defects in Saudi Arabia were cardiovascular, genitourinary, and craniofacial defects. In this review, the                                                                                                                                                                                                                                                                                                                                                                                                                                                                                                                                                                                                                                                                                                                                                                                                                                                                                                                                                                                                                                                                                                                                                                                                                                                                                                                                                                                                                                                                                                                                                                                                                                                                                                                                                                                                                                                                                                                                                                                                                                                                           | P8,9,10                         |

| Section and Topic                              | Item # | Checklist item                                                                                                                                                                                                                                                                                                                                                                                                                                                                                                                                                                                                                                                                                                                                                                                                                                                                                                | Location where item is reported |
|------------------------------------------------|--------|---------------------------------------------------------------------------------------------------------------------------------------------------------------------------------------------------------------------------------------------------------------------------------------------------------------------------------------------------------------------------------------------------------------------------------------------------------------------------------------------------------------------------------------------------------------------------------------------------------------------------------------------------------------------------------------------------------------------------------------------------------------------------------------------------------------------------------------------------------------------------------------------------------------|---------------------------------|
|                                                |        | associations of consanguinity with birth defects were reported in 12 studies; however, four extensive studies calculated an odds ratio between 1.5 - 3.3. In five studies, we found that maternal factors such as age > 40 years, obesity with BMI > 30, and maternal diabetes mellitus were significantly associated with birth defects among neonates, with higher odds ratio of 2.1, 7.8, and 2.7, respectively. Many other risk factors showed significant association with birth defects, such as family history of birth defects, folic acid supplementation during pregnancy, and socioeconomic status.                                                                                                                                                                                                                                                                                                |                                 |
|                                                | 23b    | Certain limitations on the current review should be considered before extrapolating. First, most of the included studies were retrospective studies with numerous expected uncontrolled biases in the data collection, enrolment, or poor record keeping. Second, abortions and stillbirths were excluded in some studies; subsequently, this might reduce the magnitude of the prevalence by lowering the number of diagnosed birth defect cases, giving the prevalence discrepancy between the studies. Third, the lack of genetic maps to track down the genetic problems in particular cases may contribute to the lower prevalence of chromosomal or genetic problems compared to other patterns of birth defects. Finally, the various patterns and proportions of consanguinity reduce the degree of national generalization of results but contribute a nugget of knowledge to what is already known. | P10                             |
|                                                | 23c    | No limitations of the review processes used.                                                                                                                                                                                                                                                                                                                                                                                                                                                                                                                                                                                                                                                                                                                                                                                                                                                                  | -                               |
|                                                | 23d    | The implications of the results provide data on the prevalence and pattern of birth defects in Saudi Arabia. Further comprehensive multicenter research in all regions of Saudi Arabia to describe the prevalence is recommended. In addition, it is necessary to establish a Saudi registry for birth defects and a database for the regional distributions of fetal malformations.                                                                                                                                                                                                                                                                                                                                                                                                                                                                                                                          | P11                             |
| <b>OTHER INFORMATION</b>                       |        |                                                                                                                                                                                                                                                                                                                                                                                                                                                                                                                                                                                                                                                                                                                                                                                                                                                                                                               |                                 |
| Registration and protocol                      | 24     | The International Prospective Registry of Systematic Reviews (PROSPERO) registered this systematic review protocol on February 25, 2023, under the registration number CRD42023398821.                                                                                                                                                                                                                                                                                                                                                                                                                                                                                                                                                                                                                                                                                                                        | P3                              |
| Support                                        | 25     | Self funded                                                                                                                                                                                                                                                                                                                                                                                                                                                                                                                                                                                                                                                                                                                                                                                                                                                                                                   | P11                             |
| Competing interests                            | 26     | The authors declare that there is no conflict of interest                                                                                                                                                                                                                                                                                                                                                                                                                                                                                                                                                                                                                                                                                                                                                                                                                                                     | P11                             |
| Availability of data, code and other materials | 27     | <i>The data underlying this article are available in the article and in its online supplementary material</i>                                                                                                                                                                                                                                                                                                                                                                                                                                                                                                                                                                                                                                                                                                                                                                                                 | P11                             |

Table S2.The study characteristics

| Author             | Study design / Year                                        | Region       | Sample size/ source of the information | Characteristics of the patients' with birth defects |                         |                                                                                                              |                                              |                                                                                                                              | Estimated prevalence or incidence of the birth defects |
|--------------------|------------------------------------------------------------|--------------|----------------------------------------|-----------------------------------------------------|-------------------------|--------------------------------------------------------------------------------------------------------------|----------------------------------------------|------------------------------------------------------------------------------------------------------------------------------|--------------------------------------------------------|
|                    |                                                            |              |                                        | Age                                                 | Gender                  | pattern of birth defect                                                                                      | Intervention used for the diagnosis          | Presence of other co-morbidities or risk                                                                                     |                                                        |
| Kurdi AM et al     | Prospective cohort with nested casecontrol study 2010-2013 | Riyadh       | 1,179 live birth / hospital based      | 20 weeks gestational age up to birth                | -                       | CHD 36%<br>renal 27.4%<br>Nervous system 13.6%<br>NTD 4.6%<br>Digestive system 6.3%<br>CLP 3.6%<br>Limb 8.4% | neonatal screening examination               | Lack of peri-conception folic acid.<br>consanguinity, high body mass index, advanced maternal age, smoking maternal diabetes | 41.2/1 000                                             |
| Taura MG et al     | cross-sectional study 2016-2019                            | Bisha        | 42                                     | 1 month–15 years                                    | 19 males and 23 females | CHD                                                                                                          | echocardiography                             | Down syndrome                                                                                                                | 81%                                                    |
| Kamal NM et al     | Case report 2022                                           | Saudi Arabia | 1/ hospital base                       | 6 months live birth baby                            | -                       | Arthrogryposis multiplex congenita ventricular septal defect                                                 | Molecular genetic analysis<br>Echocardiogram | Genetic mutation in the family                                                                                               | -                                                      |
| Al Bu Ali WH et al | retrospective case control study 2006-2009                 | Al Ahsa      | 38,001/ systemic registry sheet        | 1-7 days live birth babies                          | -                       | craniofacial malformations 61<br>cardiac 51<br>external genitalia 42<br>and multiple birth defects 66        | Radiological &sonographic evaluation         | rural residence<br>consanguinity<br>prematurity                                                                              | 426 (1.14%)                                            |

|                   |                                               |                                           |                                             |                                        |                                                 |                                                                                                                                 |                                             |                                                                                             |                                                                          |
|-------------------|-----------------------------------------------|-------------------------------------------|---------------------------------------------|----------------------------------------|-------------------------------------------------|---------------------------------------------------------------------------------------------------------------------------------|---------------------------------------------|---------------------------------------------------------------------------------------------|--------------------------------------------------------------------------|
| Khoshhal SQ et al | cohort retrospective 2017-2019                | Madinah                                   | 1,127 patients with CHDs/ hospital database | 3 days to less than 18 years           | 51.8% males<br>48.2% females                    | acyanotic CHDs 84.8%<br>cyanotic CHDs 13%<br>complex 2.2%                                                                       | imaging studies, and laboratory data        | -                                                                                           | -                                                                        |
| Alyami B et al    | Retrospective Cross - sectional 2013-2016     | Najran                                    | 24 367/ medical records                     | One day live birth babies              | 10 males<br>5 females<br>and 1 undetermined sex | 9 non syndromic CLP<br>7 having syndromic CLP                                                                                   | Clinical examination                        | consanguinity                                                                               | 16 (0.65 per 1000)                                                       |
| Sallout BI        | prospective study 2005-2007                   | Riyadh                                    | 7762 mother and 5379 babies/ hospital-based | 12-18 weeks gestational age            | -                                               | Genitourinary 84(38.6%)<br>Cranial 62(28.6%)<br>Skeletal 51(23.5%)<br>Abdominal 40(18.4%)<br>Cardiac 30(13.8%)<br>NTD 23(10.6%) | Antenatal ultrasound                        | consanguinity                                                                               | Antenatal prevalence ( 27.96 / 1000)<br>birth prevalence was 34.57 /1000 |
| Murshid WR et al  | prospective / cross sectional study 1996-1997 | Madinah                                   | 16,550/ hospital-based                      | 1- 28 days Live birth babies           | 15 males<br>11 females                          | Hydrocephalus                                                                                                                   | head circumference                          | Multiple pregnancies 21 (81%)<br>Consanguinity 19(73%)<br>Positive family history 4 (15.4%) | 26 (1.6 per 1,000)                                                       |
| AlSalloum A et al | prospective, cross-sectional, 2004-2005       | 13 administrative regions of Saudi Arabia | 45 682/ household community based visits    | all children below the age of 19 years | -                                               | Down syndrome 30 (6.6/10000)<br>congenital deafness 22 (4.8/10000)<br>congenital blindness 6 (1.3/10000)                        | Physical examination                        | Maternal age consanguinity                                                                  | 16.9/10000                                                               |
| Alabdulgader AA   | Cross sectional study                         | Hofuf                                     | 50,772 (740 CHD)/ hospital-based            | Newborn up to 3 years                  | 351 boys and 389 girls                          | VSD (39.5%)<br>ASD (11.5%)<br>PS (8.9%)<br>PDA (8.6%)                                                                           | X-ray, electrocardiogram and echocardiogram | Down syndrome (6%)                                                                          | CHD incidence of 10.7 / 1000                                             |

|                   |                                               |         |                                                        |                                                                                               |                                                       |                                                                                                                                                                      |                             |                              |                                                                  |
|-------------------|-----------------------------------------------|---------|--------------------------------------------------------|-----------------------------------------------------------------------------------------------|-------------------------------------------------------|----------------------------------------------------------------------------------------------------------------------------------------------------------------------|-----------------------------|------------------------------|------------------------------------------------------------------|
| Asindi AA et al   | Prospective cross sectional study 1995-2000   | Aseer   | 1386/hospital-based                                    | newborn                                                                                       | male/female ratio of 1.7:1                            | Imperforate anus (78, 44.8%), tracheo-esophageal fistula/atresia (42, 24.1%)<br>Intestinal atresia (37, 21.3%).<br>Hirschsprung's disease (14, 8%)<br>stenosis(1.7%) | -                           | Multi-systemic anomalies     | 12.4% incidence rate of 1.3 per 1000                             |
| Assiry AA et al   | Cross sectional 2010-2016                     | Hail    | 930 with congenital anomalies/hospital-based records   | One day live birth upto 28 days                                                               | Male 51.9%<br>Female 48.1%                            | Head and neck anomalies                                                                                                                                              | -                           | Female gender                | 51 (5.5%)                                                        |
| El-Attar LM et al | retrospective descriptive study 2019-2020     | Madinah | 2,541/hospital medical records                         | One day live birth upto 28 days admitted to NICU                                              | Male 49.3%<br>Female 50.7%                            | Chromosome abnormalities in 59 (39.3%)<br>Down syndrome (39)<br>Trisomy 18 (5)<br>Trisomy 13 (3)<br>Sex chromosome abnormalities (6)                                 | Images Chromosomal analysis | consanguinity rate was 52.7% | 150 ((10.7/1,000) Chromosomal abnormalities 59 (4.22/1,000).     |
| Sallout B et al   | prospective cross-sectional 2007-2012         | Riyadh  | 30 632/hospital-based                                  | Median gestational age was 30 weeks of gestation antenatal age upto one day live birth babies | Male 39.7%<br>Female 40.5%                            | Antenatal prevalence genitourinary 21.28 / 1000<br>cranial 13.55/1000<br>abdominal 8.98/1000<br>Cardiac 8/1000<br>face and neck 7.5/1000<br>NTD 6.1/1000             | Ultrasound                  | Consanguinity                | 1598 Antenatal prevalence 52.1 / 1000<br>46.5 / 1000 live births |
| Bondagji NS       | Cross sectional 2001-2010                     | Jeddah  | 43,209/hospital-based medical records                  | Antenatal mean gestational age of 26 weeks and Postnatal one day babies                       | Male 66.7%<br>Female 31.2%<br>Non differentiated 2.1% | Hydronephrosis<br>Polycystic kidney disease<br>Multi cystic dysplastic kidney<br>Renal agenesis                                                                      | Ultrasound                  | consanguinity                | 3..26/1000                                                       |
| Wasmiya A et al   | Retrospective/cross sectional study 2014-2018 | Riyadh  | 78 cleft lip and palate cases / birth data registry at |                                                                                               | Male 50%<br>Female 50%                                | Syndromic CLP 0.28/1000<br>Non syndromic CLP 1.57/1000                                                                                                               | -                           | -                            | 1.8/1000                                                         |



|                           |                                                             |         |                                                     |                             |                            |                                                                                                                                                          |                                                                                          |                                                                    |                                               |
|---------------------------|-------------------------------------------------------------|---------|-----------------------------------------------------|-----------------------------|----------------------------|----------------------------------------------------------------------------------------------------------------------------------------------------------|------------------------------------------------------------------------------------------|--------------------------------------------------------------------|-----------------------------------------------|
|                           |                                                             |         | hospital                                            |                             |                            |                                                                                                                                                          |                                                                                          |                                                                    |                                               |
| Ziyad AlHammad et al      | Retrospective cross-sectional 2015-2018                     | Riyadh  | 168 cases of clefts/ hospital-based medical records | 1 to 17 years               | Male 62%<br>Female 38%     | Unilateral CLP 34% (44/130)<br>bilateral CLP 22% (28/130)<br>Associated congenital malformations 41% (54/130)                                            | -                                                                                        | CHD was the malformation most commonly associated with OFCs (35%)  | non syndromic oro-facial clefts 130/168 (77%) |
| A.I. Hadadi, D et al      | Retrospective cross-sectional 2008-2014                     | Riyadh  | 196/ hospital-based                                 | 3-24 months,                | Male 56%<br>Female 44%     | 51(26%) CL<br>78 (40%) CP,<br>67 (34%) with CLP<br>38 (19%) were syndromic and 158 (81%) were non-syndromic                                              | -                                                                                        | Male gender                                                        | -                                             |
| Magdy Hassan Balaha et al | retrospective case control study 2006-2010                  | Al Ahsa | 37168/ hospital-based                               | 1-7 days live birth babies  | -                          | nervous system 88<br>facial defects 61<br>genitourinary 42<br>cardiac 51<br>gastrointestinal 23<br>musculoskeletal 53                                    | X-ray sonography                                                                         | body mass index > 30<br>Consanguinity<br>Low socio-economic status | 8.6 / 1000                                    |
| Majeed-Saidan MA et al    | prospective cohort study with nested case-control 2010-2013 | Riyadh  | 28,646/ hospital-based                              | Live and still birth babies | -                          | Chromosomal 78<br>Genetic syndromes 60<br>Isolated NTD 36<br>Isolated CHD 265<br>Isolated renal 239<br>Isolated others 293<br>Multiple malformations 152 | ultrasound scan ,<br>echocardiography, fetal magnetic resonance imaging, and karyotyping | consanguinity                                                      | 1,179<br><br>41.1 per 1000                    |
| Moshref, S. S et al       | Retrospective cross sectional study 2005-2015               | Jeddah  | 528 with clefts/ hospital-based medical records     | 0- 12 months                | Male 58.6%<br>Female 41.4% | CLP 40.15%<br>Isolated CP 35.61%<br>Isolated CL 24.24%.                                                                                                  | -                                                                                        | Male gender<br>smoking                                             | -                                             |

|                 |                                         |                 |                                                                     |                                |                                   |                                                                                                                                           |                     |                              |           |
|-----------------|-----------------------------------------|-----------------|---------------------------------------------------------------------|--------------------------------|-----------------------------------|-------------------------------------------------------------------------------------------------------------------------------------------|---------------------|------------------------------|-----------|
| F. Al-Jama      | Retrospective cross sectional 1992-1997 | Al-Khobar       | 14762/hospital-based medical records                                | Live birth babies              | male/female ratio 1:2:1           | CNS 48.8%<br>musculoskeletal 11.2%<br>renal defects 9.2%<br>gastrointestinal 4.8%<br>Cardiac 4.4%<br>GIT 6.1%<br>chromosomal defects 6.1% | -                   | Diabetic women               | 17.0/1000 |
| Alorainy, I. A  | Retrospective cross sectional           | Riyadh          | 808/hospital-based MRI reports                                      | children younger than 15 years | Male 48.8%<br>Female 51.2%        | Congenital cerebral malformation (NTD, cortical migrational abnormalities, and corpus callosum anomalies) 86 (14.8%)                      | MRI                 | -                            | -         |
| AlShail E et al | Retrospective cross sectional 2000-2012 | Riyadh & Jeddah | 718 NTD/hospital-based registry                                     | -                              | Male 42%<br>Female 58%            | -                                                                                                                                         | Ultrasound          | Inadequate folic acid intake | -         |
| Aziza A et al   | Retrospective cross sectional 2002-2009 | Riyadh          | 447 craniofacial anomalies/hospital-based registry                  | -                              | a male-to-female ratio of 1.18:1. | Craniosynostosis 33.3%<br>ear, face, and neck 39.3%<br>eye 6.6%<br>musculoskeletal 16.5%                                                  | -                   | Consanguinity family history | -         |
| Al-Jurayyan NA  | Retrospective Cross sectional 1989-2008 | Riyadh          | 81 children with ambiguous genitalia/hospital based medical records | 1 day to 8 years               | 65.4% genetically females         | congenital adrenal hyperplasia 96.1%                                                                                                      | chromosomal studies | family history               | -         |

ASD :atrial septal defects CHD : congenital heart disease ,CL: Cleft lip, CP: Cleft palate, CLP: Cleft lip and palate, NTD : neural tube defects, PDA : patent ductus arteriosus , PS : pulmonary stenosis ,VSD : ventricular septal defects, NICU: neonatal intensive care unit

Table S3. Risk factors associated with birth defects

| Study                                   | Risk factor               | OR        | 95% CI      |
|-----------------------------------------|---------------------------|-----------|-------------|
| Kurdi AM et al <sup>21</sup>            | Consanguinity             | 1.52      | 1.28 - 1.81 |
|                                         | Maternal age, >40 years   | 2.11      | 1.35 - 3.30 |
|                                         | Diabetes mellitus         | 1.98      | 1.33 - 2.95 |
|                                         | Sibling with anomalies    | 1.49      | 1.04 - 2.12 |
| Al Bu Ali WH et al <sup>23</sup>        | Consanguinity             | 1.54      | 1.24-1.92   |
|                                         | Rural residence           | 1.29      | 1.03-1.61   |
|                                         | Prematurity               | 1.26      | 1.02-1.57   |
| Sallout B et al <sup>33</sup>           | Nationality (Saudi)       | 2.22      | 1.02 - 4.76 |
|                                         | Age (16 to 24)            | 1.56      | 1.22 - 2.04 |
|                                         | Family History            | 2.33      | 1.75 - 3.13 |
|                                         | Number of Anomalies (>1)  | 1.52      | 1.22 - 1.89 |
| Magdy Hassan Balaha et al <sup>38</sup> | Low socio-economic status | 2.1 - 2.3 | 1.18–4.33   |
|                                         | Obesity (BMI > 30)        | 2.7-7.83  | 1.3 –15.4   |
|                                         | Consanguinity             | 3.32      | 1.54–7.17   |
| Majeed-Saidan MA et al <sup>39</sup>    | Consanguinity             | 1.5       | 1.2 - 1.9   |
|                                         | Folic acid intake         | 1.4       | 1.2 - 1.6   |
|                                         | Diabetes mellitus         | 2.7       | 1.4 - 5.4   |
